# Supplementary material for: Interplay of Multiple Sediment Routing Systems Revealed by Combined Sandstone Petrography and Heavy Mineral Analysis (HMA) in the South Pyrenean Foreland Basin
Source: MDPI journal article supplement (doi:10.3390/min12020262), 2022-02-18
Supplement: s1 [file s1]

Archive with 4 entries (4 files):
- minerals-1581537-supplementary for proof/minerals-1581537-supplementary - 1.pdf
- minerals-1581537-supplementary for proof/Sample coordinates.xlsx
- minerals-1581537-supplementary for proof/Table S1.xlsx
- minerals-1581537-supplementary for proof/Table S2.xlsx
