# Supplementary material for: Interplay of Multiple Sediment Routing Systems Revealed by Combined Sandstone Petrography and Heavy Mineral Analysis (HMA) in the South Pyrenean Foreland Basin
Source: MDPI journal article supplement (doi:10.3390/min12020262), 2022-02-18

# Supplementary Materials: Interplay of Multiple Sediment Routing Systems Revealed by Combined Sandstone Petrography and Heavy Mineral Analysis (HMA) in the South Pyrenean Foreland Basin

Xavier Coll, Marta Roigé, David Gómez-Gras\*, Antonio Teixell, Salvador Boya and Narcís Mestres

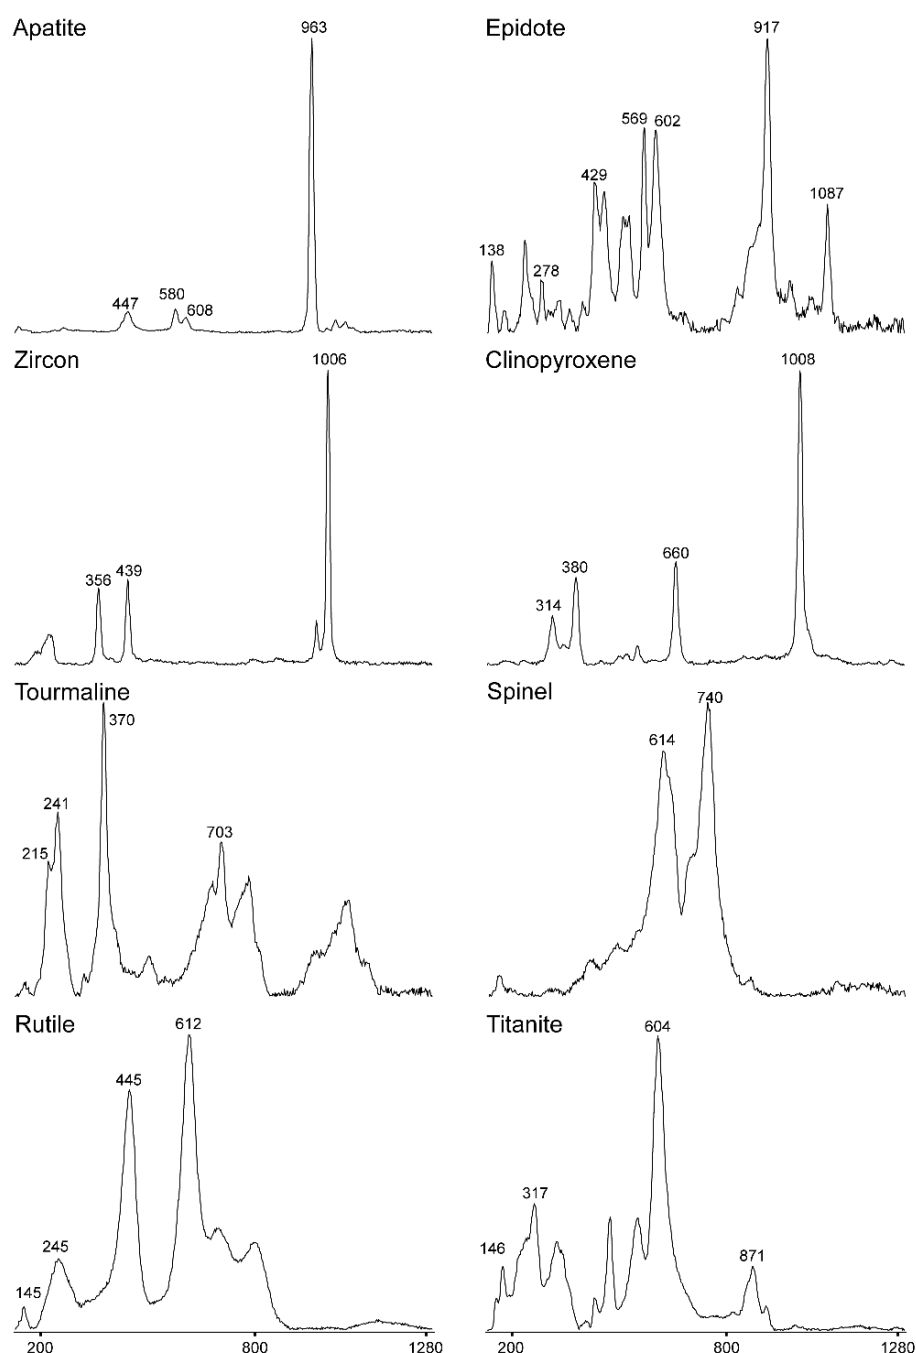

**Figure S1.** Representative Raman spectra of heavy minerals from the late Eocene–Miocene Jaca basin (1).

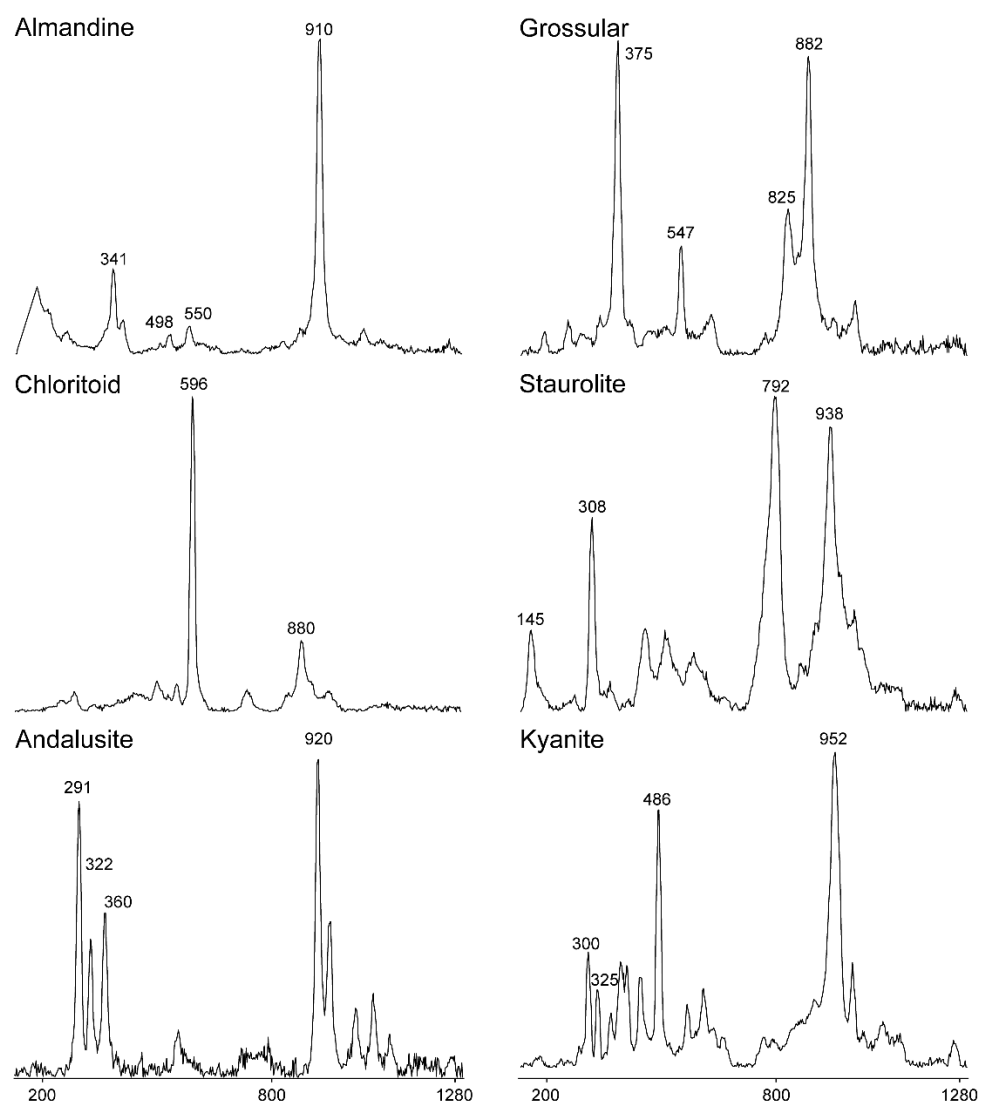

**Figure S2.** Representative Raman spectra of heavy minerals from the late Eocene–Miocene Jaca basin (2).

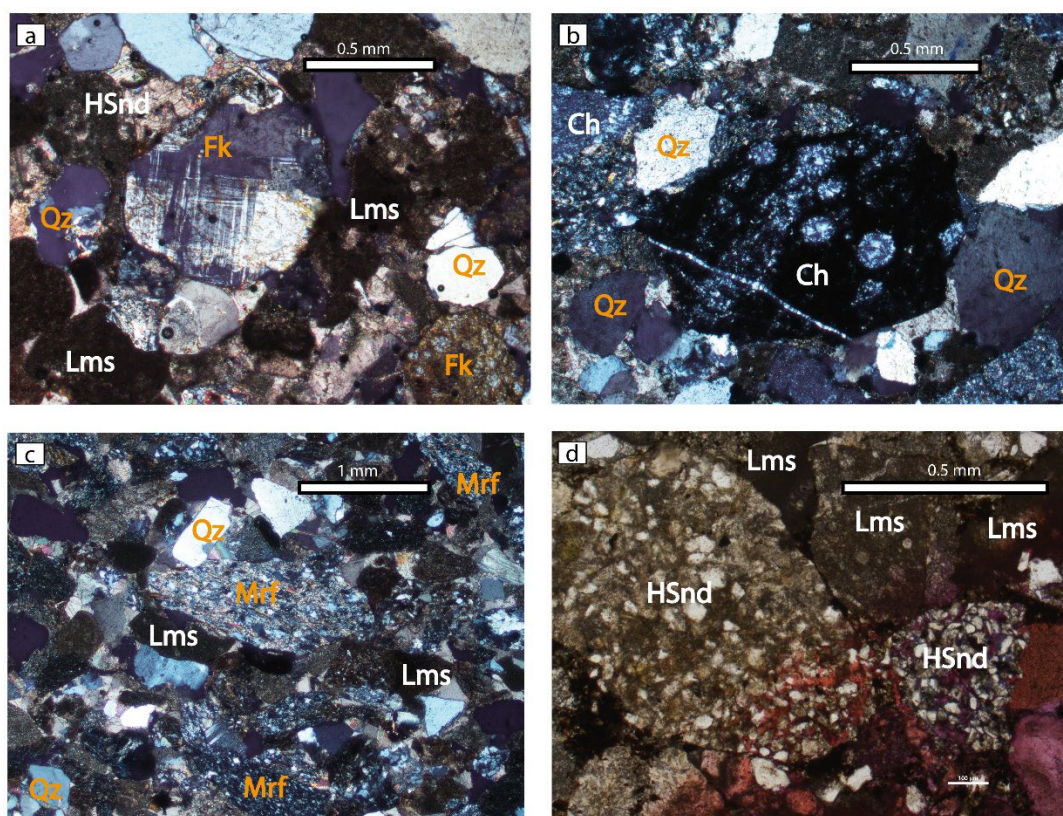

Figure S3. Optical photomicrographs of distinct extrabasinal grains.

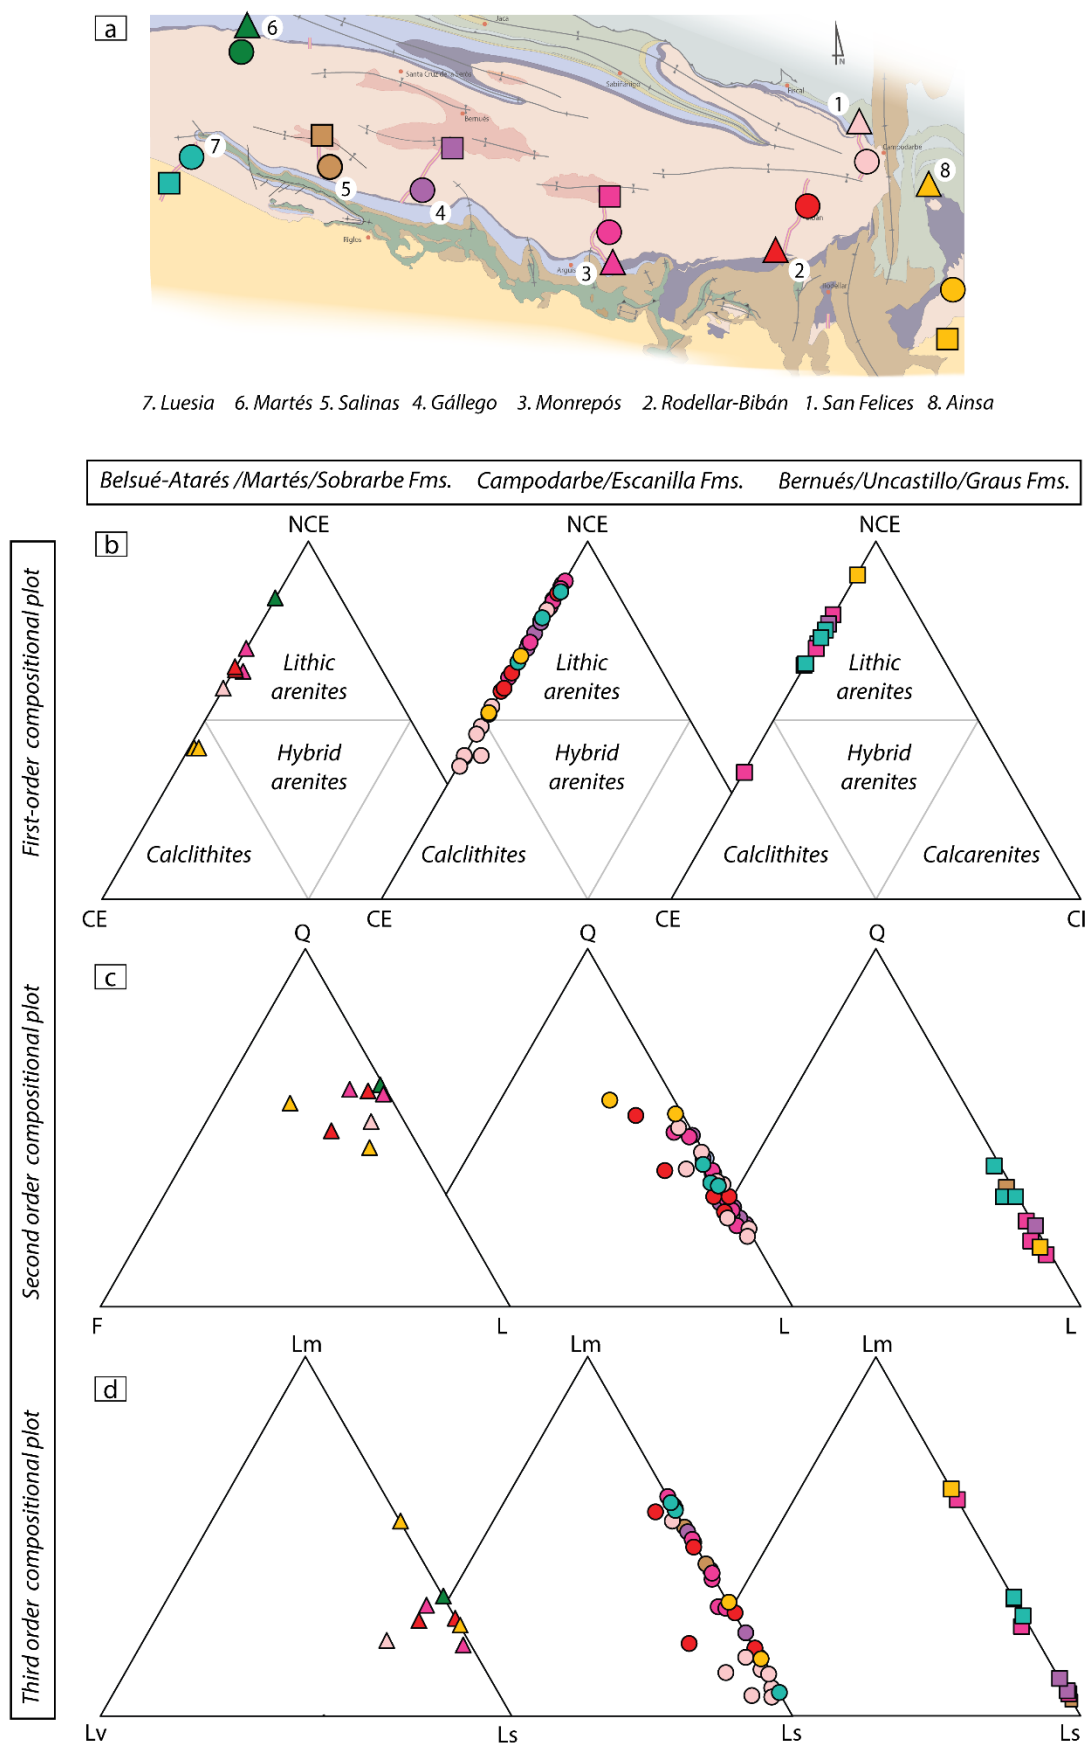

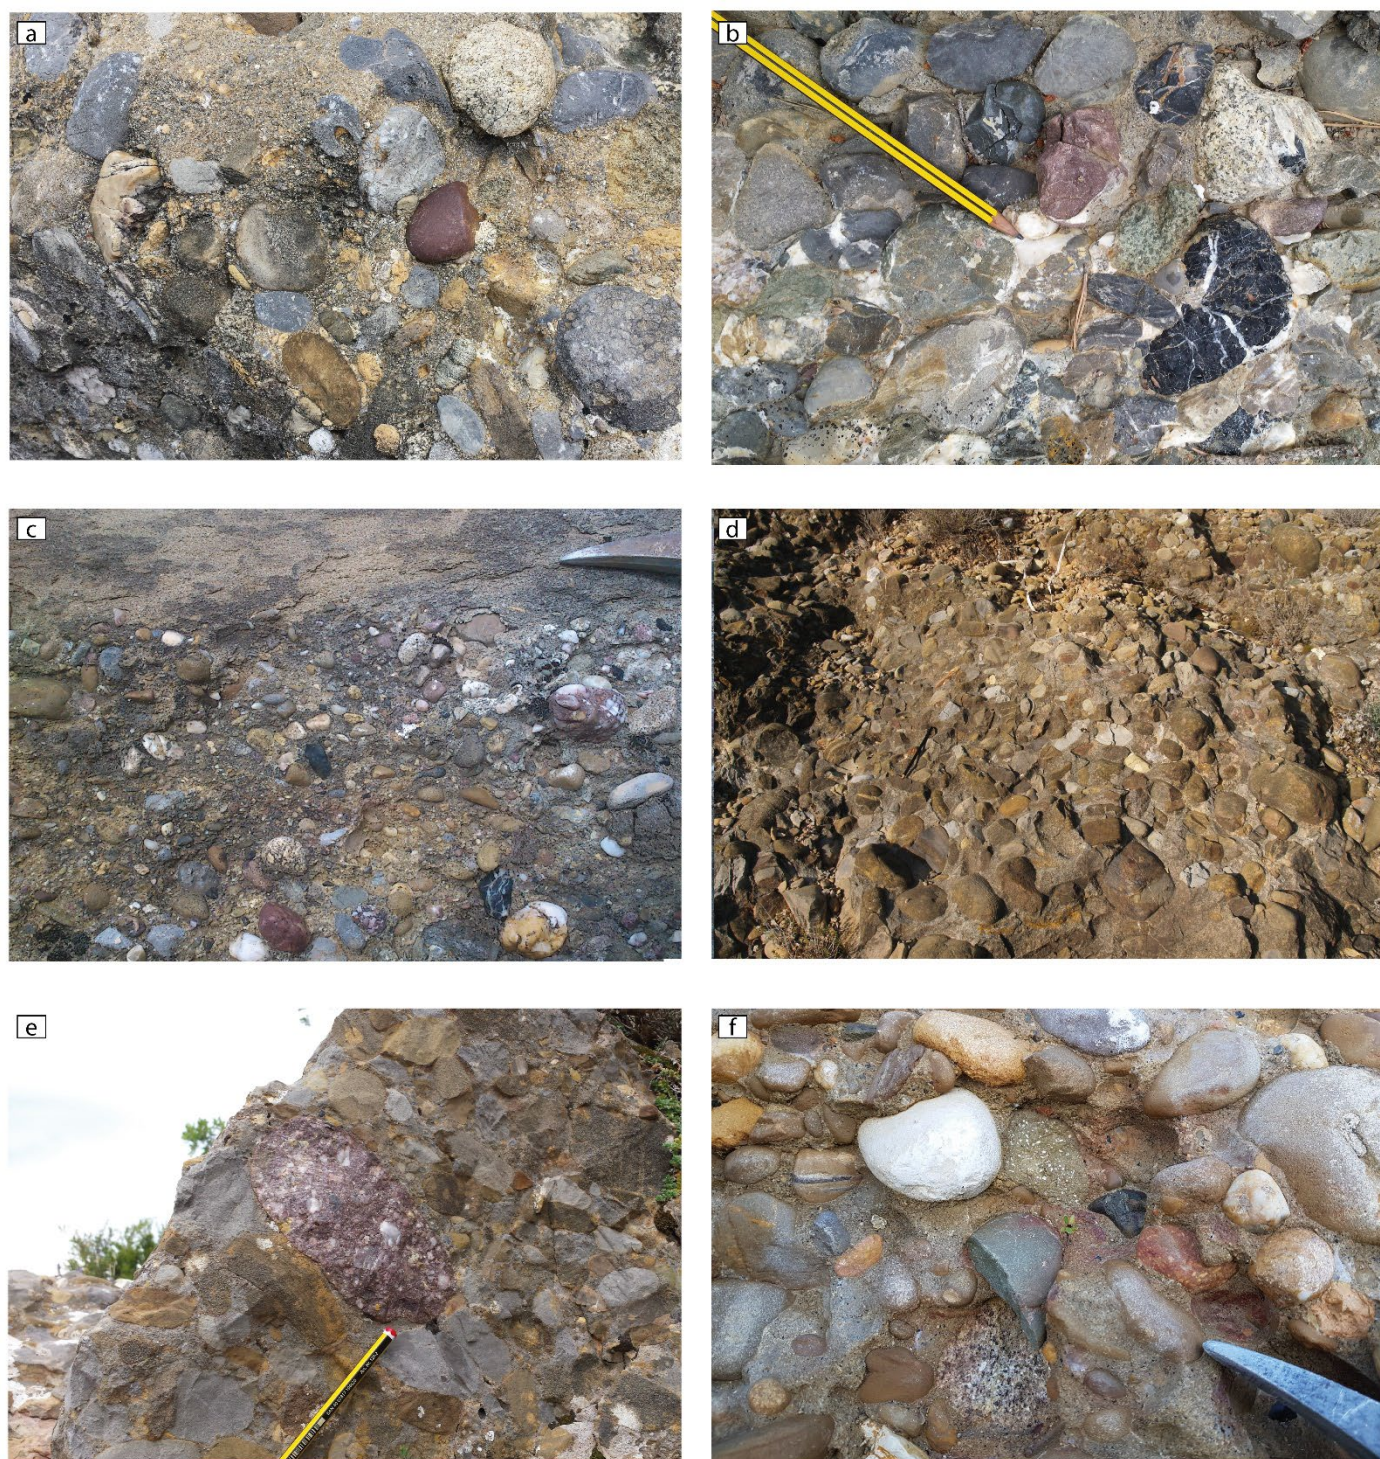

**Figure S5.** Images of the appearance of each of the described petrofacies in the conglomerate-sized deposits.

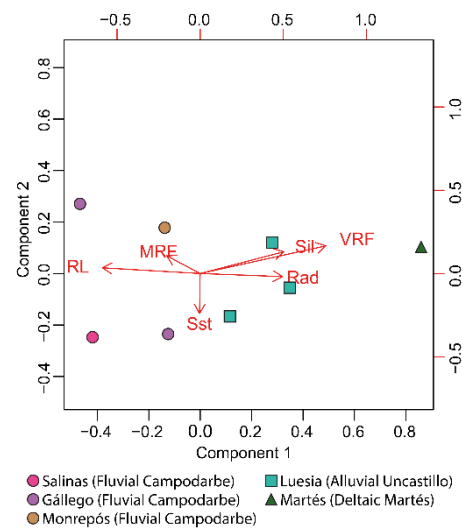

**Figure S6.** Biplot of the two sub-groups of the MLC petrofacies.

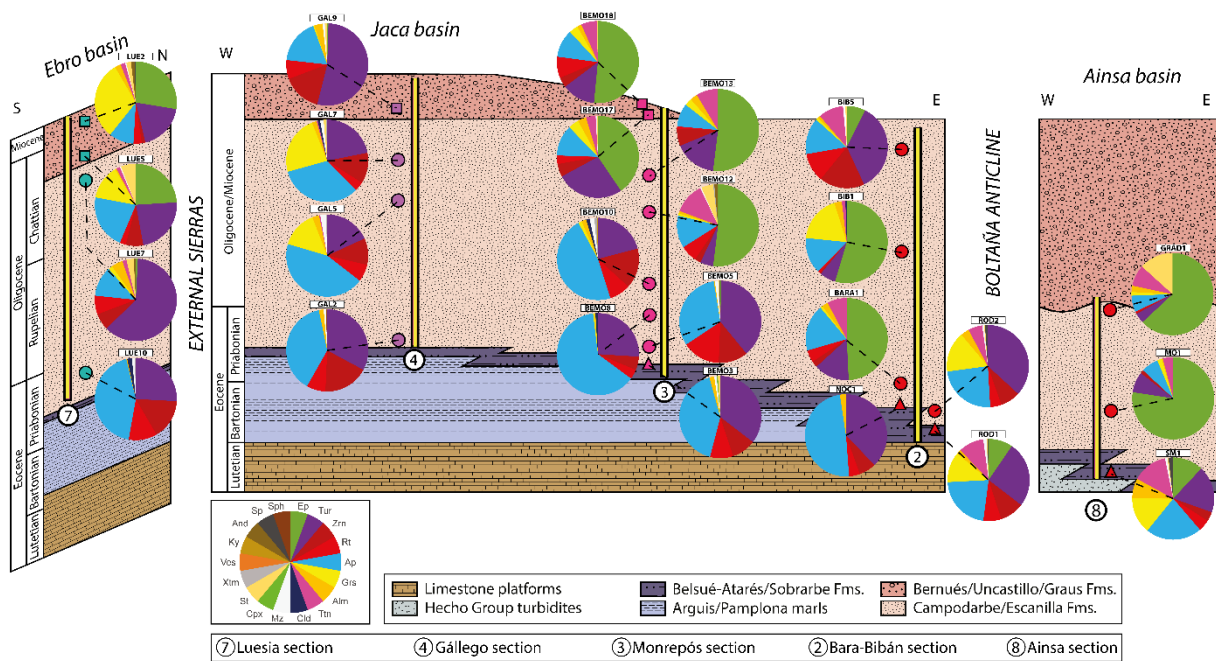

Supplement: s1 [file s1 › minerals-1581537-supplementary for proof/minerals-1581537-supplementary - 1.pdf]
