# Supplementary material for: Interplay of Multiple Sediment Routing Systems Revealed by Combined Sandstone Petrography and Heavy Mineral Analysis (HMA) in the South Pyrenean Foreland Basin
Source: MDPI journal article supplement (doi:10.3390/min12020262), 2022-02-18
Supplement: s1 [file s1 › minerals-1581537-supplementary for proof/Sample coordinates.xlsx]

## Sheet: Libro2
Coordinates of all analyzed samples
SAMPLE	LONGITUD (°)	LATITUD (°)
SF2	-0.018591	42.4431
SF3	-0.018408	42.4395
SF5	-0.019158	42.4333
SF7	-0.016588	42.4277
SFF11	-0.008588	42.4127
SF13	-0.010117	42.4016
SF16	-0.0235	42.4043
SF18	-0.031054	42.399
SF19	-0.031521	42.3983
ROD1	-0.069426	42.2633
ROD2	-0.069854	42.2506
ROD3	-0.071918	42.25
NOC1	-0.257966	42.3071
BARA1	-0.134526	42.328
BIB1	-0.096665	42.3756
BIB2	-0.097333	42.3771
BIB5	-0.089202	42.3954
BEMO1	-0.362595	42.3088
BEMO3	-0.37438	42.3165
BEMO5	-0.398677	42.3277
BEMO8	-0.404566	42.3357
BEMO10	-0.393164	42.3398
BEMO11	-0.393989	42.3475
BEMO12	-0.381139	42.3602
BEMO13	-0.382663	42.3675
BEMO14	-0.387023	42.3765
BEMO16	-0.384576	42.3836
BEMO17	-0.391734	42.3933
BEMO18	-0.392359	42.3958
GAL2	-0.677216	42.3877
GAL3	-0.650748	42.4064
GAL4	-0.640698	42.4197
GAL5	-0.638352	42.4227
GAL7	-0.627324	42.428
GAL8	-0.620982	42.4381
GAL9	-0.614691	42.4448
GAL10	-0.595807	42.4717
BAI1	-0.78645	42.4155
BAI2	-0.79519	42.4331
BAI3	-0.794264	42.4449
BAI4	-0.793457	42.4588
MAR1	-0.893066	42.5669
MAR2	-0.892234	42.5647
LUE10	-0.97159	42.4564
LUE9	-0.970459	42.4489
LUE7	-0.986307	42.4375
LUE5	-1.00198	42.4259
LUE3	-1.01253	42.4095
LUE2	-1.02936	42.3941
SM1	0.077514	42.3714
SM2	0.077303	42.3714
MO1	0.126053	42.277
OL1	0.124928	42.2744
GRAD1	0.223083	42.1748
