# Supplementary material for: Interplay of Multiple Sediment Routing Systems Revealed by Combined Sandstone Petrography and Heavy Mineral Analysis (HMA) in the South Pyrenean Foreland Basin
Source: MDPI journal article supplement (doi:10.3390/min12020262), 2022-02-18
Supplement: s1 [file s1 › minerals-1581537-supplementary for proof/Table S1.xlsx]

## Sheet: Table S1
Table S1. Sandstone compositional data (point counting analyses).
	SFE2	SFE3	SFE5	SFE7	SFE11	SFE13	SFE16	SFE18	SFE19	ROD1	ROD3	NOC1	BARA1	BIB1	BIB2	BIB5	BEMO1	BEMO3	BEMO5	BEMO8	BEMO10	BEMO11	BEMO12	BEMO13	BEMO14	BEMO16	BEMO17	BEMO18	GAL2	GAL3	GAL4	GAL5	GAL7	GAL8	GAL9	GAL10	BAI1	BAI2	BAI3	BAI4	MART1	MART2	LUE10	LUE9	LUE7	LUE5	LUE3	LUE2	SM1
Total siliciclastic extrabasinal	134	86	121	101	117	85	108	186	86	151	139	151	146	162	87	120	158	150	150	194	184	165	214	142	162	67	145	183	151	173	188	187	166	157	142	181	175	204	157	152	225	189	207	185	154	137	162	191	83
Total detrital quartz	69	33	52	22	40	21	54	65	17	74	53	91	78	50	23	37	96	89	73	92	70	50	55	38	37	16	21	34	42	83	55	43	41	65	32	56	65	55	65	51	139	70	82	64	52	42	64	59	37
Monocrystalline non-undulose quartz	37	19	35	16	28	10	38	38	15	35	38	54	54	26	11	34	71	49	53	44	39	22	23	20	13	11	11	9	26	48	31	17	29	45	18	37	53	30	45	42	63	42	52	47	42	28	47	37	21
Monocrystalline undulose quartz	1	0	1	1	0	0	2	1	0	8	1	3	7	2	0	0	3	2	0	1	0	1	0	0	0	0	0	0	0	0	1	0	0	0	0	0	0	0	3	0	5	0	3	1	2	0	2	0	2
Quartz with inherited syntaxial cement	1	0	0	0	0	0	0	0	0	0	1	0	0	0	0	0	0	1	0	0	0	0	0	0	0	0	0	0	0	0	0	0	0	0	0	0	0	0	0	0	0	0	0	0	0	1	0	0	1
Quartz polycristalline with 2-3 subgrains	7	2	2	4	2	2	5	10	0	8	3	7	6	1	0	1	2	3	4	8	8	4	2	3	0	0	0	2	1	3	1	3	1	0	1	3	2	1	1	1	25	4	3	4	2	1	1	4	1
Quartz polycristalline with >3 subgrains	14	7	6	0	7	1	3	2	1	8	3	19	5	6	4	2	12	14	6	20	7	6	10	8	1	4	4	9	8	9	9	3	2	7	3	4	2	15	3	3	22	9	10	5	6	3	5	11	3
Quartz keuper	6	0	1	1	0	1	0	0	0	3	3	0	3	1	1	0	2	3	1	2	1	1	3	0	1	0	0	3	1	4	1	0	3	5	1	0	1	0	2	0	0	0	2	0	0	0	1	2	4
Quartz in plutonic r.f.	1	1	0	0	0	0	0	0	0	10	0	0	1	1	0	0	2	3	0	1	0	0	0	0	0	0	0	0	0	0	0	0	1	0	0	1	0	0	0	0	6	0	0	0	0	1	0	0	2
Quartz in metamorphic r.f.	0	0	0	0	0	0	0	0	0	0	0	0	0	0	0	0	0	0	0	0	0	0	0	0	0	0	0	0	0	0	0	0	0	0	0	0	0	0	0	0	18	0	0	0	0	0	0	0	0
Quartz in sandstone r.f.	2	4	5	0	3	7	6	14	1	2	4	8	2	13	7	0	4	14	9	16	15	16	17	5	21	1	2	11	6	19	12	0	5	8	9	8	7	9	11	5	0	15	12	7	0	8	7	5	3
Quartz in hybrid sandstone r.f.	0	0	2	0	0	0	0	0	0	0	0	0	0	0	0	0	0	0	0	0	0	0	0	2	1	0	4	0	0	0	0	20	0	0	0	3	0	0	0	0	0	0	0	0	0	0	1	0	0
Cc replacement on quartz	0	0	0	0	0	0	0	0	0	0	0	0	0	0	0	0	0	0	0	0	0	0	0	0	0	0	0	0	0	0	0	0	0	0	0	0	0	0	0	0	0	0	0	0	0	0	0	0	0
Total detrital feldspar	11	6	1	0	0	3	3	2	1	29	17	7	17	6	3	0	14	2	7	3	1	2	4	2	4	1	2	5	1	1	6	0	1	2	0	3	1	4	1	2	2	2	4	5	2	5	2	1	10
Detrital K-feld	3	1	1	0	0	3	3	2	1	14	9	3	6	5	3	0	6	0	5	1	0	1	4	2	4	1	1	5	0	1	3	0	1	2	0	3	0	3	0	2	0	0	1	2	2	0	2	1	8
K-feld in plutonic r.f.	0	0	0	0	0	0	0	0	0	1	3	0	1	0	0	0	0	0	0	0	0	0	0	0	0	0	0	0	0	0	0	0	0	0	0	0	0	0	0	0	0	0	0	0	0	1	0	0	0
Detrital plagioclase	5	2	0	0	0	0	0	0	0	8	4	4	10	1	0	0	4	1	2	1	0	1	0	0	0	0	1	0	1	0	3	0	0	0	0	0	1	1	1	0	2	2	2	3	0	4	0	0	1
Plagioclase in plutonic r.f.	0	0	0	0	0	0	0	0	0	1	0	0	0	0	0	0	0	0	0	0	0	0	0	0	0	0	0	0	0	0	0	0	0	0	0	0	0	0	0	0	0	0	0	0	0	0	0	0	0
Detrital Microcline	3	3	0	0	0	0	0	0	0	5	1	0	0	0	0	0	4	1	0	1	1	0	0	0	0	0	0	0	0	0	0	0	0	0	0	0	0	0	0	0	0	0	1	0	0	0	0	0	1
Microcline in plutonic r.f	0	0	0	0	0	0	0	0	0	0	0	0	0	0	0	0	0	0	0	0	0	0	0	0	0	0	0	0	0	0	0	0	0	0	0	0	0	0	0	0	0	0	0	0	0	0	0	0	0
Illite replacement on feldpar	0	0	0	0	0	0	0	0	0	0	0	0	0	0	0	0	0	0	0	0	0	0	0	0	0	0	0	0	0	0	0	0	0	0	0	0	0	0	0	0	0	0	0	0	0	0	0	0	0
Illite replacement feldspar on plut. R.f.	0	0	0	0	0	0	0	0	0	0	0	0	0	0	0	0	0	0	0	0	0	0	0	0	0	0	0	0	0	0	0	0	0	0	0	0	0	0	0	0	0	0	0	0	0	0	0	0	0
Cc replacement on K-feld	0	0	0	0	0	0	0	0	0	0	0	0	0	0	0	0	0	0	0	0	0	0	0	0	0	0	0	0	0	0	0	0	0	0	0	0	0	0	0	0	0	0	0	0	0	0	0	0	0
Total fine lithics	54	47	68	79	77	61	51	119	68	48	69	53	51	106	61	83	48	59	70	99	113	113	155	102	121	50	122	144	108	89	127	144	124	90	110	122	109	145	91	99	84	117	121	116	100	90	96	131	36
Phyllites	2	0	7	0	1	3	3	41	0	1	7	7	12	20	5	6	3	1	13	10	23	18	47	2	9	4	2	21	20	20	24	43	25	4	1	1	16	13	15	1	1	20	24	23	2	1	6	8	6
Schists	7	0	3	0	1	4	4	19	6	2	4	5	3	20	8	8	8	4	4	22	32	27	41	9	22	5	4	45	39	28	33	34	39	11	4	5	42	48	17	0	6	29	42	36	1	17	16	18	8
Chloritochists lithic	0	0	0	0	0	0	0	0	0	0	0	1	0	0	0	0	0	0	0	0	0	0	0	0	0	0	0	0	0	0	0	0	0	0	0	0	1	0	0	0	0	0	1	0	0	0	0	0	0
Quartzite	3	3	2	6	2	1	0	13	2	6	3	3	13	14	6	1	2	8	5	9	6	5	14	5	11	3	1	19	6	4	8	13	7	7	3	7	8	14	9	3	4	3	8	12	3	7	9	17	6
Plutonic r.f.	0	0	0	0	0	0	0	1	0	4	0	2	2	0	0	0	0	0	0	0	0	0	0	0	0	0	0	0	0	0	0	0	0	0	0	0	0	0	0	0	0	0	0	0	0	0	0	0	0
Cc replacement on plut. r.f.	0	0	0	0	0	0	0	0	0	0	0	0	0	0	0	0	0	0	0	0	0	0	0	0	0	0	0	0	0	0	0	0	0	0	0	0	0	0	0	0	0	0	0	0	0	0	0	0	0
Volcanic r.f.	0	0	1	0	1	6	0	0	0	0	0	0	2	0	1	2	1	0	0	1	0	0	2	0	0	0	0	2	0	0	0	0	0	0	0	0	0	0	0	0	0	0	0	0	0	0	0	0	0
Volcanic chert	0	0	0	0	0	0	0	0	0	0	0	0	0	0	0	0	0	0	0	0	0	0	0	0	0	0	0	0	0	0	0	0	0	0	0	0	0	1	0	0	0	0	0	0	0	1	0	0	0
Vitric volcanic lithic	0	0	0	0	0	0	0	0	0	0	0	0	0	0	0	0	0	0	0	0	0	0	0	0	0	0	0	0	0	0	0	0	0	0	0	0	0	0	0	0	0	0	0	0	0	0	0	0	0
Volcanic lithic with microlitic	3	0	0	0	0	0	0	0	0	0	0	0	0	0	0	0	0	0	0	2	0	1	0	0	0	0	0	2	0	0	4	0	0	0	0	0	0	0	0	0	3	0	0	0	0	0	0	0	0
Volcanic lithic with lathwork texture	0	0	0	0	0	0	2	0	0	7	8	0	0	0	0	0	1	3	2	2	0	0	0	4	1	0	2	3	1	2	0	3	1	0	1	1	0	3	1	0	2	1	1	3	0	4	1	0	1
sandstone r.f.	4	1	0	1	1	4	3	7	1	6	2	7	3	8	0	1	2	2	1	1	2	3	7	4	10	0	2	0	0	2	2	0	0	0	4	1	2	2	1	0	0	2	3	4	1	12	4	7	1
Hybrid sandstone r.f.	0	8	1	22	23	6	3	0	10	0	0	0	0	0	15	9	0	0	0	0	0	0	0	4	5	5	15	2	2	1	2	0	8	3	12	21	0	1	2	9	7	0	0	4	0	4	0	1	0
Siltstone r.f.	16	1	6	3	4	11	16	31	10	15	30	17	11	25	5	5	17	21	22	18	22	32	18	11	28	7	19	24	11	22	23	28	17	21	6	15	19	33	15	11	14	30	23	17	14	10	14	29	11
Hybrid Siltstone r.f.	4	26	25	40	36	9	10	0	39	0	1	0	0	0	21	47	1	2	2	0	0	5	1	48	19	18	71	2	4	2	5	5	10	35	63	59	1	5	8	52	18	8	0	4	62	13	19	21	2
Chlorite	0	0	0	0	0	0	0	0	0	0	0	0	0	0	0	0	4	0	0	0	0	0	0	0	0	1	0	1	1	1	0	0	0	0	0	0	0	0	0	0	0	0	0	0	0	0	0	0	0
Chert	4	0	0	0	0	0	0	0	0	4	4	1	1	3	0	0	5	5	5	2	1	1	2	3	3	2	2	5	2	3	0	3	4	2	0	2	0	7	4	1	9	0	0	0	4	3	7	5	0
Muscovite	2	0	0	0	0	0	1	0	0	0	1	2	1	1	0	0	1	0	0	0	0	0	0	1	0	0	0	0	0	0	0	1	0	0	1	0	1	0	0	0	0	0	0	0	0	0	0	0	1
Biotite	0	0	2	0	0	0	0	0	0	0	0	1	0	0	0	0	0	0	0	1	1	0	0	0	0	0	0	0	0	0	0	0	0	0	0	0	0	0	0	0	0	0	0	0	0	0	0	0	0
Heavy minerals	0	0	0	0	0	0	0	0	0	0	0	0	0	0	0	0	0	0	1	0	1	0	0	1	0	0	0	0	0	0	0	0	0	0	0	0	0	0	0	0	0	2	0	0	0	0	0	0	0
Silicified r.f.	6	8	5	5	7	16	1	2	0	0	1	5	3	2	0	3	3	5	13	9	5	4	0	6	0	1	4	1	7	0	4	4	0	4	8	8	4	7	7	20	10	2	6	4	13	7	11	6	0
Cc replacement silificied r.f.	0	0	0	0	0	0	0	0	0	0	0	0	0	0	0	0	0	0	0	0	0	0	0	0	0	0	0	0	0	0	0	6	0	0	0	0	0	0	0	0	0	0	0	0	0	0	0	0	0
Fe-oxid replacement r.f.	2	0	16	2	0	0	5	1	0	0	6	1	0	9	0	1	0	0	0	9	12	11	9	1	12	4	0	11	13	0	17	0	10	2	0	1	15	8	7	1	0	20	12	6	0	1	1	2	0
Silificied limestone	0	0	0	0	0	0	0	0	0	0	0	0	0	0	0	0	0	0	0	0	0	0	0	0	0	0	0	0	0	0	0	0	0	0	0	0	0	0	0	0	0	0	0	0	0	0	0	0	0
Radiolarite r.f.	0	0	0	0	1	1	3	4	0	1	2	1	0	4	0	0	0	8	2	13	8	6	14	3	1	0	0	6	2	4	5	4	3	1	7	1	0	3	5	1	10	0	1	3	0	10	8	17	0
Alterite	1	0	0	0	0	0	0	0	0	2	0	0	0	0	0	0	0	0	0	0	0	0	0	0	0	0	0	0	0	0	0	0	0	0	0	0	0	0	0	0	0	0	0	0	0	0	0	0	0
Total carbonate extrabasinal	93	129	130	141	101	99	101	45	145	82	81	84	106	28	132	83	68	80	87	44	23	65	33	88	33	122	61	48	64	50	43	37	57	46	76	55	40	28	78	61	43	28	33	51	78	71	54	70	111
Monocrystalline sparitic limestone	0	1	2	3	2	0	2	1	0	4	6	2	13	3	1	0	10	7	1	1	1	2	0	4	0	3	3	1	1	2	1	0	4	1	1	0	2	0	1	0	0	0	3	2	1	0	0	1	0
Polycrystalline sparitic r.f.	7	3	3	1	2	1	7	3	7	14	3	17	16	1	2	3	5	6	14	5	2	2	5	0	0	2	0	7	0	2	0	1	4	0	1	0	1	0	0	0	0	2	1	0	0	0	2	1	0
Dolomitized polycrystalline r.f.	0	0	0	0	0	0	0	0	1		3		0	0	0	0	0	1	0	0	0	0	0	0	0	0	0	0	0	0	0	0	0	0	0	0	0	0	0	0	0	0	0	0	0	0	0	0	0
Biomicritic	7	0	10	7	7	15	2	5	10	1	10	2	5	0	5	8	10	6	1	0	0	0	2	0	0	0	0	2	0	0	0	0	0	0	0	0	0	0	0	0	0	0	1	0	0	0	0	0	20
Biosparitic	0	0	0	0	0	1	0	0	1	0	0	1	0	0	0	1	0	0	1	0	0	0	0	0	0	2	0	0	0	0	0	0	0	0	0	0	0	0	0	0	0	0	0	2	0	0	2	1	0
Dolomicrite r.f	0	0	0	0	0	0	0	0	0	1	1	1	1	0	0	0	0	0	2	0	0	0	1	0	0	0	0	0	0	0	0	0	0	0	0	0	0	0	0	0	0	0	0	0	0	0	0	0	0
Dolomite monocrystalline	0	0	0	0	0	0	3	0	0	0	2	4	8	0	0	0	4	1	4	0	0	1	2	0	0	0	0	0	1	0	0	0	0	0	0	0	0	0	0	0	0	0	0	0	0	0	0	0	4
Dolostone r.f. (sacaroidea)	1	0	0	0	0	0	14	2	0	5	6	8	8	0	3	0	0	7	6	4	0	1	3	0	0	0	0	3	2	0	0	1	0	0	0	0	0	0	0	0	0	0	0	2	0	0	0	2	0
Bioclastic grainstone r.f.	18	12	21	26	6	4	4	4	14	6	5	1	1	0	9	2	1	8	0	4	1	2	0	4	15	18	3	2	2	6	13	5	5	0	4	1	0	3	11	0	0	2	1	7	2	20	1	1	3
Dolomitized bioclastic grainstone r.f.	0	0	0	0	0	0	0	0	0	0	0	0	0	0	0	0	0	0	0	0	0	0	0	0	0	0	0	0	0	0	0	0	0	0	0	0	0	0	0	0	0	0	0	0	0	0	0	0	0
Bioclastic Packes-Wackes r.f.	18	67	62	61	60	48	25	13	61	18	23	11	11	3	51	31	8	9	17	10	3	25	11	53	18	60	32	17	26	9	16	9	17	25	40	45	7	18	43	33	29	11	2	11	28	34	23	34	35
Dolomitized bioclastic Packes-Wackes r.f.	0	0	0	0	0	0	0	0	0	0	0	0	0	1	0	0	0	0	0	0	0	0	0	0	0	0	0	0	0	0	0	0	0	0	0	0	0	0	0	0	0	0	0	0	0	0	0	0	0
Biomicritic mudstone r.f.	42	27	29	22	21	30	43	17	48	33	22	37	43	20	61	38	30	35	41	20	16	32	9	27	0	37	21	16	32	31	13	21	26	16	23	9	28	6	23	18	14	13	25	27	44	13	24	26	49
Dolomitized biomicritic mudstone	0	0	0	0	3	0	0	0	0	0	0	0	0	0	0	0	0	0	0	0	0	0	0	0	0	0	0	0	0	0	0	0	0	0	0	0	0	0	0	0	0	0	0	0	0	0	0	0	0
Extrabasinal bioclasts	0	19	3	21	0	0	1	0	3	0	0	0	0	0	0	0	0	0	0	0	0	0	0	0	0	0	2	0	0	0	0	0	1	4	7	0	2	1	0	10	0	0	0	0	3	4	2	4	0
Total carbonate intrabasinal	0	0	0	10	0	0	0	0	1	0	0	0	0	0	0	0	0	6	0	0	0	0	0	0	0	0	1	0	0	0	0	0	0	0	0	0	0	0	0	0	0	0	1	0	0	0	0	0	2
Reworked calcrete clasts	0	0	0	10	0	0	0	0	1	0	0	0	0	0	0	0	0	0	0	0	0	0	0	0	0	0	1	0	0	0	0	0	0	0	0	0	0	0	0	0	0	0	0	0	0	0	0	0	0
Bioclasts	0	0	0	0	0	0	0	0	0	0	0	0	0	0	0	0	0	6	0	0	0	0	0	0	0	0	0	0	0	0	0	0	0	0	0	0	0	0	0	0	0	0	1	0	0	0	0	0	2
Total non-carbonate intrabasinal	0	0	0	0	0	0	0	0	0	0	0	0	0	0	0	0	0	0	0	0	0	0	0	0	0	0	0	0	0	0	0	0	0	0	0	0	0	0	0	0	0	0	0	12	0	0	0	0	0
Total matrix	0	0	0	7	0	0	0	0	0	0	0	0	0	0	0	0	3	0	0	0	0	0	0	0	0	0	0	0	0	0	0	0	0	0	0	0	0	0	0	0	0	0	0	0	0	0	0	7	0
Diagenetics minerals	87	130	77	84	100	136	115	96	92	83	108	83	74	145	104	97	103	80	70	81	106	106	59	85	115	144	127	89	105	99	77	93	103	111	105	68	101	84	69	112	66	104	77	76	89	108	102	78	123
Total porosity	0	0	0	0	0	0	0	0	0	0	0	0	0	0	0	0	0	0	2	0	0	0	0	0	0	0	0	5	0	0	0	0	0	0	0	0	0	0	0	0	0	0	0	0	0	0	0	0	0
TOTAL POINTS	314	345	328	343	318	320	324	327	324	316	328	318	326	335	323	300	332	316	309	319	313	336	306	315	310	333	334	325	320	322	308	317	326	314	323	304	316	316	304	325	334	321	318	324	321	316	318	346	319
[truncated: 4 more columns]
