# Supplementary material for: Interplay of Multiple Sediment Routing Systems Revealed by Combined Sandstone Petrography and Heavy Mineral Analysis (HMA) in the South Pyrenean Foreland Basin
Source: MDPI journal article supplement (doi:10.3390/min12020262), 2022-02-18
Supplement: s1 [file s1 › minerals-1581537-supplementary for proof/Table S2.xlsx]

## Sheet: Hoja1
Table S2. Heavy-mineral compositional data (point counting analyses).
	SM1	MO1	GRAD1	ROD1	RODE2	NOC1	BARA1	BIB1	BIB5	BM3	BM5	BM8	BEMO10	BEMO12	BEMO13	BEMO17	BEMO18	GAL2	GAL5	GAL7	GAL9	LUE10	LUE7	LUE5	LUE2
Ap	48	15	13	53	64	102	38	29	29	87	74	131	101	27	19	29	25	82	97	71	38	116	29	44	21
Zrn	8	3	1	23	21	14	5	1	36	20	27	11	34	5	14	12	9	38	23	26	33	42	16	14	3
Tur	40	18	8	62	99	79	29	13	72	74	90	54	45	11	35	63	30	70	40	47	115	69	151	47	40
Rt	10	0	1	17	12	9	10	2	23	19	35	8	18	14	2	8	19	16	15	8	16	30	18	5	7
Ep	26	171	128	23	0	0	102	112	15	0	1	0	0	110	108	96	117	0	0	0	1	0	2	49	59
Ttn	30	9	17	24	15	0	16	3	20	0	0	0	0	26	18	9	14	0	1	1	0	0	4	3	4
Grs	31	4	3	29	43	0	2	38	2	0	0	1	3	2	6	10	8	0	32	50	1	0	4	28	66
Alm	17	1	5	4	9	5	5	6	2	4	1	1	4	2	6	8	4	4	6	4	7	1	11	1	5
St	1	0	27	1	1	0	0	0	1	2	1	0	0	10	0	1	1	0	0	2	2	0	7	12	4
Mz	2	0	0	3	2	0	0	0	2	2	3	0	4	1	0	1	0	2	5	3	2	3	0	1	1
Xtm	0	0	0	0	0	0	0	0	0	0	0	0	2	1	0	0	0	0	1	1	0	1	0	0	0
Cpx	0	0	0	0	0	0	0	0	0	1	0	0	0	0	0	0	0	0	0	0	0	0	0	0	0
Sp	4	0	0	1	3	0	0	0	0	0	1	0	0	0	0	0	0	0	0	0	0	0	0	0	1
Sph	0	0	0	0	0	0	0	0	0	0	0	0	0	0	0	0	0	1	0	0	0	0	0	0	0
Cld	0	0	0	0	0	0	0	1	0	0	0	2	3	0	0	0	0	0	0	2	0	5	0	0	0
And	0	0	0	0	0	0	0	0	0	0	0	0	0	3	0	0	0	0	0	0	0	0	2	0	3
Ky	0	0	0	0	0	0	0	0	0	0	0	0	1	0	0	0	0	0	0	0	0	0	0	0	0
TOTAL	217	221	203	240	269	209	207	205	202	209	233	208	215	212	208	237	227	213	220	215	215	267	244	204	214
